# Supplementary material for: Sex differences in the genome-wide DNA methylation pattern and impact on gene expression, microRNA levels and insulin secretion in human pancreatic islets
Source: PubMed Central journal article supplement (PMC4256841; doi:10.1186/s13059-014-0522-z), 2014-12-03

**Additional file 1: Sex does not affect the relative beta-cell number in human pancreatic islets.** Analysis of beta cell number with transmission electron microscopy showed no difference between male (n=6) and female (n=7) islets ( $p=0.29$ ). Statistics was calculated using Mann-Whitney. Data is presented as mean  $\pm$  sem.

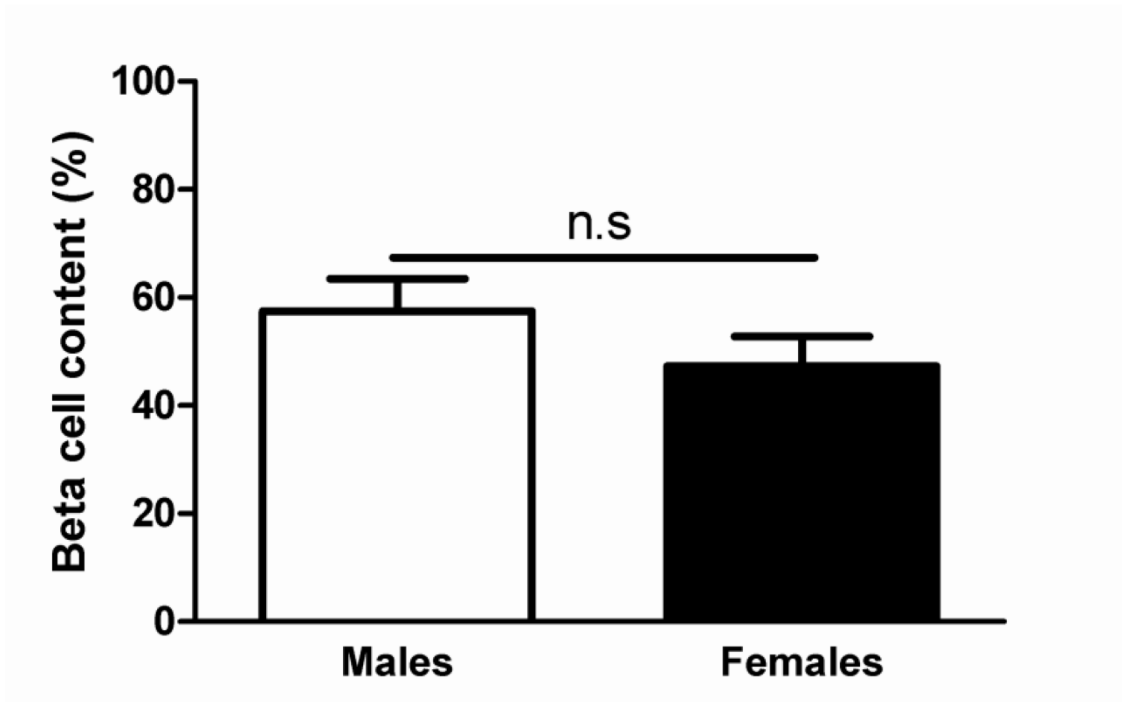

Supplement: 13059_2014_522_MOESM1_ESM.pdf [file 13059_2014_522_MOESM1_ESM.pdf]
