# Supplementary material for: Sex differences in the genome-wide DNA methylation pattern and impact on gene expression, microRNA levels and insulin secretion in human pancreatic islets
Source: PubMed Central journal article supplement (PMC4256841; doi:10.1186/s13059-014-0522-z), 2014-12-03
Supplement: 13059_2014_522_MOESM10_ESM.pdf [file 13059_2014_522_MOESM10_ESM.pdf]

**Additional file 10:** Results from KEGG pathway analysis of genes with a differential methylation in males and females for the autosomal chromosome genes.

| Higher DNA methylation in Males                      |                                |                                |                                |                        |                         |                                                |
|------------------------------------------------------|--------------------------------|--------------------------------|--------------------------------|------------------------|-------------------------|------------------------------------------------|
| Pathway<br>(total number of genes<br>in the pathway) | Observed<br>number of<br>genes | Expected<br>number of<br>genes | Ratio<br>Observed/<br>expected | Raw<br><i>p</i> -value | Adj.<br><i>p</i> -value | Observed genes                                 |
| Adipocytokine signaling<br>pathway (68)              | 3                              | 0.26                           | 11.43                          | 0.0023                 | 0.0299                  | <i>IRS1, PRKAG2, NPY</i>                       |
| Higher DNA methylation in Females                    |                                |                                |                                |                        |                         |                                                |
| Pathway<br>(total number of genes<br>in the pathway) | Observed<br>number of<br>genes | Expected<br>number of<br>genes | Ratio<br>Observed/<br>expected | Raw<br><i>p</i> -value | Adj.<br><i>p</i> -value | Observed genes                                 |
| Cell adhesion molecules<br>(CAMs) (130)              | 5                              | 0.86                           | 5.83                           | 0.0017                 | 0.0408                  | <i>HLA-G, ITGAL, HLA-C,<br/>CNTNAP2, NRXN1</i> |
